# Supplementary material for: Sequential immunization induces strong and broad immunity against all four dengue virus serotypes
Source: PubMed Central journal article supplement (PMC7382454; doi:10.1038/s41541-020-00216-0), 2020-07-24
Supplement: 41541_2020_216_MOESM1_ESM.pdf [file 41541_2020_216_MOESM1_ESM.pdf]

Sequential immunization induces strong and broad immunity against all four dengue virus serotypes

## **Supplementary Information For**

Sequential immunization induces strong and broad immunity against all four dengue virus serotypes

Jue Hou<sup>1</sup>, Shubham Shrivastava<sup>1</sup>, Hooi Linn Loo<sup>1</sup>, Lan Hiong Wong<sup>1</sup>, Eng Eong Ooi<sup>1,2</sup>, Jianzhu Chen<sup>1,3,\*</sup>

Sequential immunization induces strong and broad immunity against all four dengue virus serotypes

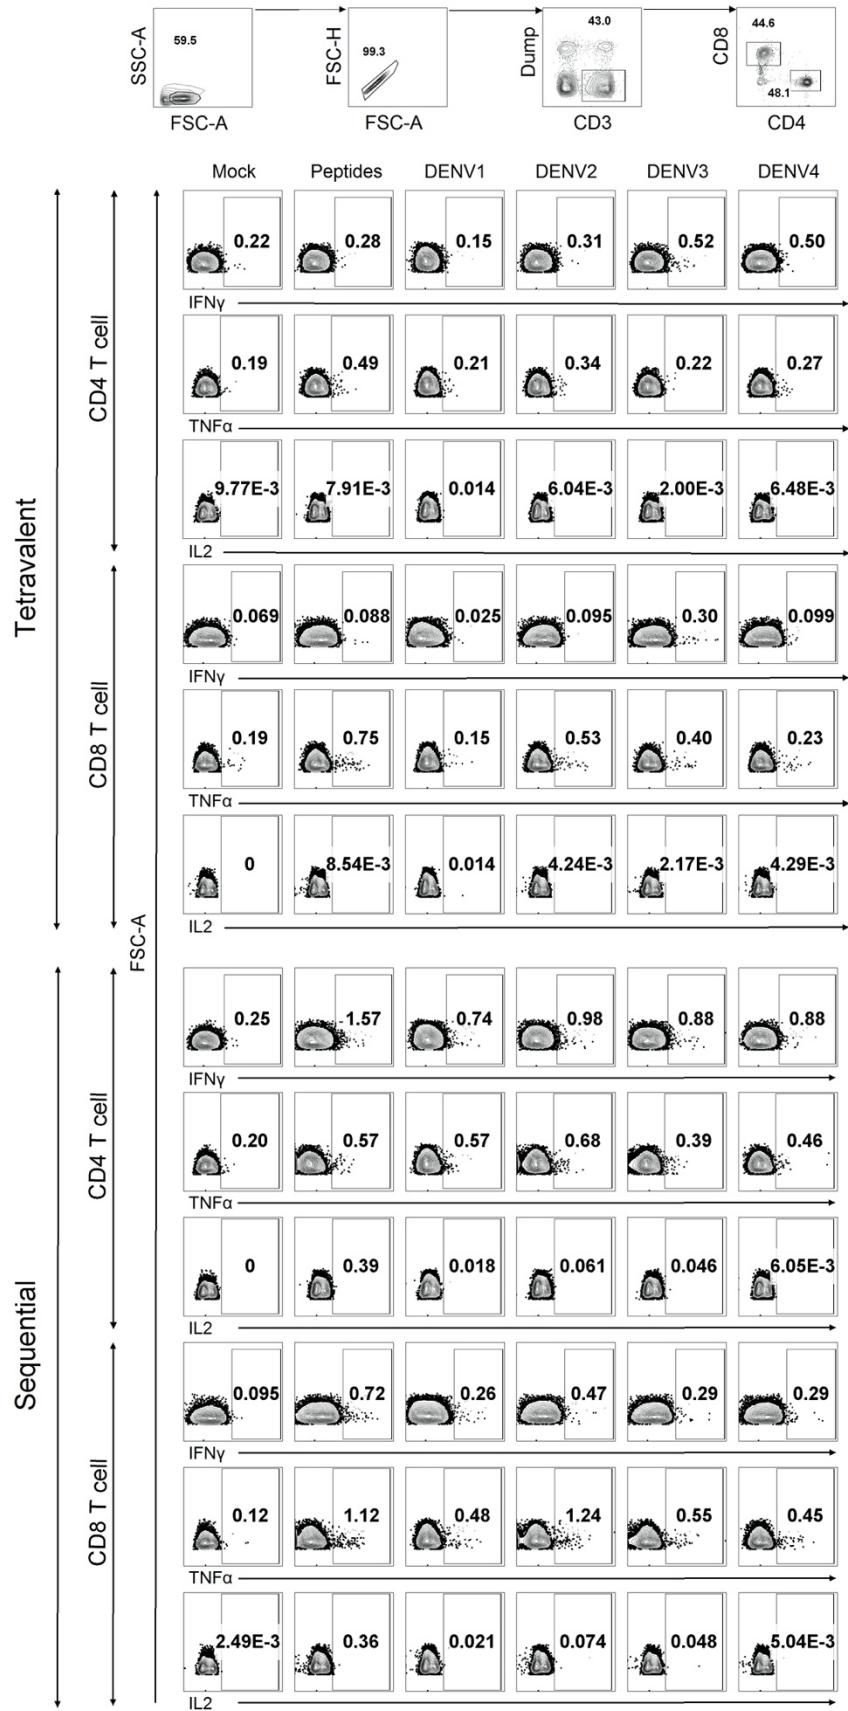

Sequential immunization induces strong and broad immunity against all four dengue virus serotypes

**Supplementary Figure 1. Flow cytometry gating strategies for T cells in the spleen and the representative profiles of intracellular cytokines staining.**

Splenocytes from immunized mice were stimulated with peptides or virus for 6 hours, followed by surface staining for CD3, CD4, CD8, and Dump (F4/80, CD11c, Ly6G, and NK1.1), followed by intracellular staining for IFN $\gamma$ , TNF $\alpha$  and IL-2. Lymphocytes were gated based FSC vs SSC and used for CD3 vs Dump plots. CD4 vs CD8 staining was shown in CD3<sup>+</sup> cells. Expression of intracellular IFN $\gamma$ , TNF $\alpha$  and IL-2 are shown in CD4<sup>+</sup> and CD8<sup>+</sup> T cells. The gates for positive intracellular cytokine staining were based on the corresponding non-stimulated controls (mock) and FMO (Fluorescence minus One) controls.

Sequential immunization induces strong and broad immunity against all four dengue virus serotypes

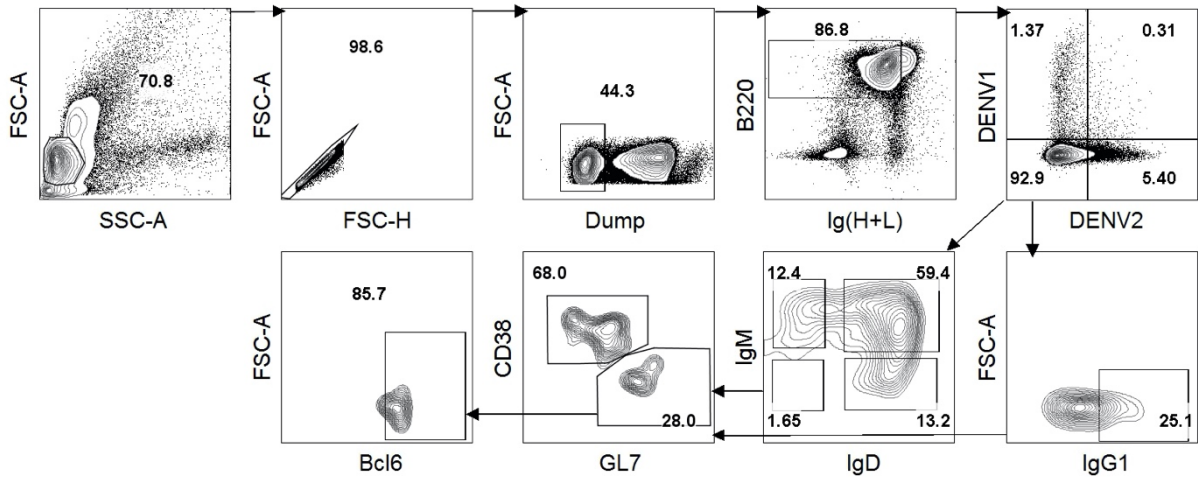

**Supplementary Figure 2. Flow cytometry gating strategies for B cells.**

Splenocytes from immunized mice were stained for DENV1 and DENV2 specific probes, followed by surface staining for dumps (CD90.2, F4/80, CD11c, CD4, CD8, Ly6G, and NK1.1), B220, Ig<sub>(H+L)</sub>, IgM, IgD, IgG1, GL7, and CD38. B cells were identified by surface B220<sup>+</sup> and intracellular Ig<sub>(H+L)</sub> expression. The antigen specific B cells were identified as DENV1<sup>+</sup>, DENV2<sup>+</sup> and DENV1<sup>+</sup>DENV2<sup>+</sup>. The subsets were distinguished by IgG1, IgD and IgM expression into IgG1<sup>+</sup>, IgM<sup>-</sup>IgD<sup>-</sup>, IgM<sup>+</sup>IgD<sup>-</sup>, IgM<sup>+</sup>IgD<sup>+</sup>, and IgM<sup>-</sup>IgD<sup>+</sup>. In total antigen-specific B cells or each Ig subset, the memory cells (CD38<sup>+</sup>GL7<sup>-</sup>) and germinal center cells (CD38<sup>-</sup>GL7<sup>+</sup>) were gated for analyzing of intranuclear Bcl-6 expression.

Sequential immunization induces strong and broad immunity against all four dengue virus serotypes

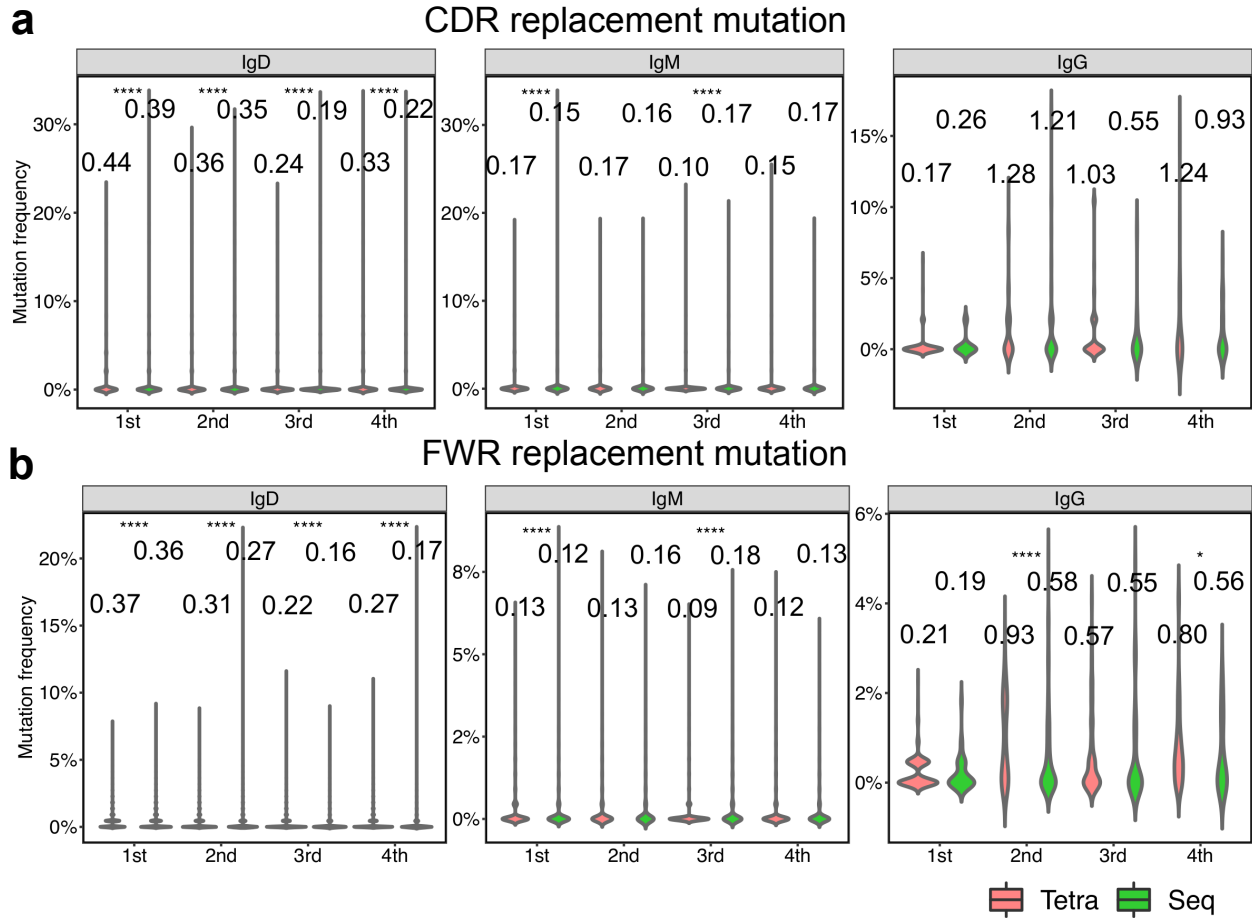

**Supplementary Figure 3. The replacement mutation frequencies in CDR and FWR of IgD, IgM and IgG isotypes.**

The replacement mutation frequencies in CDR (a) and FWR (b) of IgD, IgM and IgG were calculated and shown as violin plot to present the distribution shape of the data. The value above each violin plot is the mean value of mutation frequency of given group and dose. The labelled asterisk shows the statistical significance by Wilcoxon test analysis between two immunization strategies at a given dose. \*  $p < 0.05$ , \*\*  $p < 0.01$ , \*\*\*  $p < 0.001$ , \*\*\*\*  $p < 0.0001$ .

Sequential immunization induces strong and broad immunity against all four dengue virus serotypes

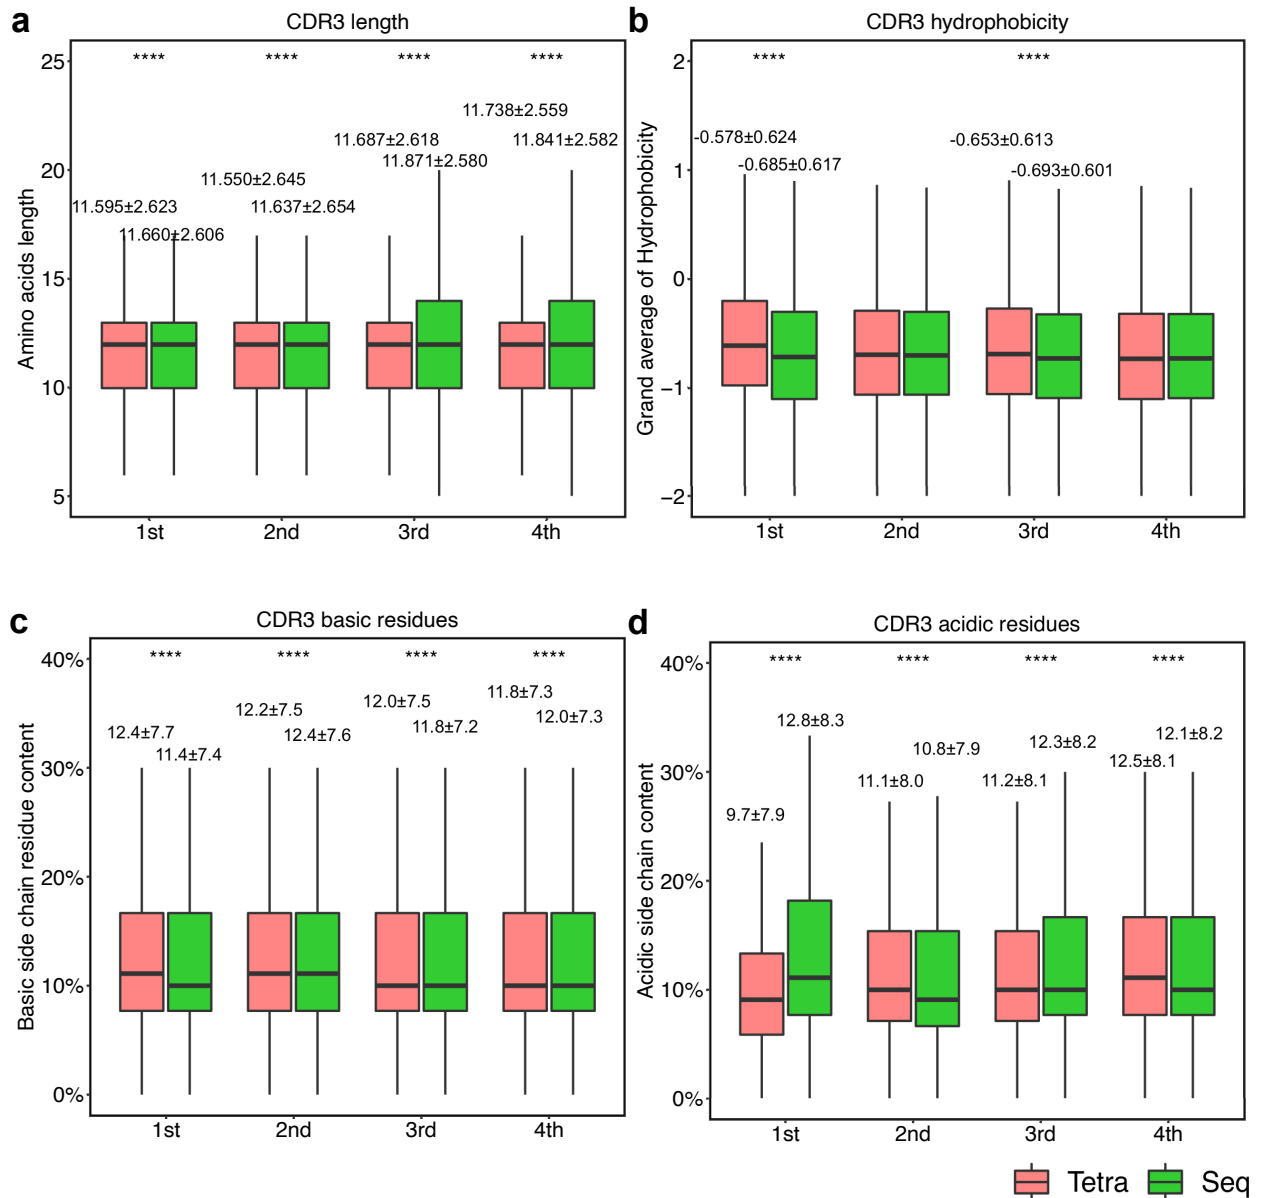

**Supplementary Figure 4. The comparisons of CDR3 features between tetraivalent and sequential immunizations.**

The final Ig repertoires (sequence quantity of each sample referred to Table 2) were used for these analyses. The CDR3 length (a), hydrophobicity (b), percentages of basic residues (c) and acidic residues (d) in CDR3 are shown as mean ± SD. \*  $p < 0.05$ , \*\*  $p < 0.01$ , \*\*\*  $p < 0.001$ , \*\*\*\*  $p < 0.0001$  by Wilcoxon test analysis.

Sequential immunization induces strong and broad immunity against all four dengue virus serotypes

**Supplementary Table 1 Flow cytometry antibody list**

| Assay       | Color              | Mab                        | Clone            | Isotype        | Catalog       | Company   | Conc. (mg/ml) | Work Volume (μL) |
|-------------|--------------------|----------------------------|------------------|----------------|---------------|-----------|---------------|------------------|
| T cell      | APC-Cy7            | FVS780                     | Viability        | ---            | 565388        | BD        | ---           | 0.25             |
|             | APC-Cy7            | F4/80                      | BM8              | Rat, IgG2a, κ  | 123118        | Biologend | 0.2           | 0.75             |
|             | APC-Cy7            | CD11c                      | N418             | Ar Ham, IgG, κ | 117324        | Biologend | 0.2           | 0.25             |
|             | APC-Cy7            | Ly-6G (Gr-1)               | RB6-8C5          | Rat, IgG2b, κ  | 557661        | BD        | 0.2           | 0.5              |
|             | APC-Cy7            | NK1.1                      | PK136            | Ms, IgG2a, κ   | 560618        | BD        | 0.2           | 0.5              |
|             | BUV395             | CD3e                       | 145-2C11         | Ar Ham IgG1, κ | 563565        | BD        | 0.2           | 1.5              |
|             | AF647              | CD4                        | RM4-5            | Rat IgG2a, κ   | 557681        | BD        | 0.2           | 1                |
|             | PerCP-Cy5.5        | CD8a                       | 53-6.7           | Rat IgG2a, κ   | 551162        | BD        | 0.2           | 1                |
|             | BUV737             | IFN $\gamma$               | XMG1.2           | Rat IgG1, κ    | 564693        | BD        | 0.2           | 2                |
|             | PE                 | TNF $\alpha$               | MP6-XT22         | Rat IgG1       | 554419        | BD        | 0.2           | 2                |
|             | PE-Cy5             | IL2                        | JES6-5H4         | Rat IgG2b, κ   | 503824        | Biologend | 0.2           | 1                |
|             | APC-Cy7            | FVS780                     | Viability        | ---            | 565388        | BD        | ---           | 0.25             |
|             | B cell and sorting | APC-Cy7                    | CD90.2 (Thy-1.2) | 53-2.1         | Rat, IgG2a, κ | 561641    | BD            | 0.2              |
| APC-Cy7     |                    | F4/80                      | BM8              | Rat, IgG2a, κ  | 123118        | Biologend | 0.2           | 0.75             |
| APC-Cy7     |                    | CD11c                      | N418             | Ar Ham, IgG, κ | 117324        | Biologend | 0.2           | 0.25             |
| APC-Cy7     |                    | CD4                        | GK1.5            | Rat, IgG2b, κ  | 552051        | BD        | 0.2           | 0.25             |
| APC-Cy7     |                    | CD8a                       | 53-6.7           | Rat, IgG2b, κ  | 557654        | BD        | 0.2           | 1                |
| APC-Cy7     |                    | Ly-6G (Gr-1)               | RB6-8C5          | Rat, IgG2b, κ  | 557661        | BD        | 0.2           | 0.5              |
| APC-Cy7     |                    | NK1.1                      | PK136            | Ms, IgG2a, κ   | 560618        | BD        | 0.2           | 0.5              |
| AF546       |                    | Den1                       | ---              | ---            | ---           | In-house  | ---           | 0.5              |
| AF647       |                    | Den2                       | ---              | ---            | ---           | In-house  | ---           | 1                |
| PE-CF594    |                    | Bcl-6                      | K112-91          | mouse IgG1, κ  | 562401        | BD        | ---           | 5                |
| PE-Cy7      |                    | IgM                        | R6-60.2          | Rat, IgG2a, κ  | 552867        | BD        | 0.2           | 0.3              |
| PerCP-Cy5.5 |                    | IgD                        | 11-26c           | Rat, IgG2a, κ  | 564273        | BD        | 0.2           | 0.3              |
| FITC        |                    | GL7                        | GL7              | Rat, IgM, κ    | 553666        | BD        | 0.5           | 1                |
| BUV737      |                    | CD45R (B220)               | RA3-6B2          | Rat, IgG2a, κ  | 564449        | BD        | 0.2           | 0.3              |
| BUV395      |                    | CD38                       | 90               | Rat, IgG2a, κ  | 740245        | BD        | 0.2           | 0.3              |
| AF 350      |                    | IgG (H+L) F(ab) $\gamma$ 2 | ---              | Goat           | A-11068       | Life Tech | 2             | 0.3              |
|             |                    | IgG1-Biotin                | A85-1            | Rat, IgG1, κ   | 550331        | BD        | 0.5           | 1                |
| BV786       | Streptavidin       | ---                        | ---              | 563858         | BD            | 0.1       | 0.3           |                  |

Sequential immunization induces strong and broad immunity against all four dengue virus serotypes

**Supplementary Table 2 The pre-amplification PCR Primers for germinal center B cell genes**

| Sequence Name | Sequence (5'-3')       |
|---------------|------------------------|
| Irf3-For      | GAGAGCCGAACGAGGTTCA    |
| Irf3-Rev      | AGCAGCTAACCGCAACACTT   |
| Irf4-For      | CAGGAGCTGGAGGGATTATG   |
| Irf4-Rev      | GGCTTCAGCAGACCTTATGC   |
| Irf5-For      | CAGTACCCAGGGCTTCAGTG   |
| Irf5-Rev      | GCTTTTGTTAAGGGCACAGC   |
| Irf8-For      | GATCGAACAGATCGACAGCA   |
| Irf8-Rev      | TCTTCAAAAATCTGGGCTCTTG |
| Ifnar1-For    | CCCAGAGTTCACCCTCAAGA   |
| Ifnar1-Rev    | TGAGTGGTGGGAAGCACAC    |
| Ifnar2-For    | GGAGGGCATGGAGAGCTAC    |
| Ifnar2-Rev    | TTTTGGAAGTGACAGGTGGA   |
| Ifngr1-For    | GTGCCTGTACCGACGAATG    |
| Ifngr1-Rev    | TTGACCGTGCATAGTCAGATTC |
| Nfkb1-For     | AGGCCATTGAAGTGATCCAG   |
| Nfkb1-Rev     | CAGAGATAGCAGTGGGCTGTC  |
| Nfkb2-For     | AGCGTTGCTGGACTACGG     |
| Nfkb2-Rev     | GTGGTTGGTGAGGTTGATGA   |
| Nfatc1-For    | GGTGCTGTCTGGCCATAACT   |
| Nfatc1-Rev    | GAAACGCTGGTACTGGCTTC   |
| Mki67-For     | CGTGTATCCTTTGGTGGACA   |
| Mki67-Rev     | CACTGGAAGTCCTGCCTGAT   |
| Bcl6-For      | AGTTTACCCGGCACGCTAGT   |
| Bcl6-Rev      | TATTGCCTTCCCTCAGGTTG   |
| Myc-For       | TCCTGTACCTCGTCCGATTC   |
| Myc-Rev       | GCACCTCTTGAGGACCAGTG   |
| Tbx21-For     | CGCGAGGACTACGCATTG     |
| Tbx21-Rev     | CTTCCACACTGCACCCACT    |
| Slamf1-For    | GTCTGCGATTGCTGGCTAA    |
| Slamf1-Rev    | GAGGATGCGGACACTTTTGT   |
| Tnfrsf13c-For | GGACTGATACTGGCGCTGAC   |
| Tnfrsf13c-Rev | CGCTGTCTGCATCTTCTTTG   |
| Prdm1-For     | ACAGAGGCCGAGTTTGAAGA   |
| Prdm1-Rev     | GGCATTCTTGGAAGTGTGT    |
| Fas-For       | CGCTGTTTTCCCTTGCTG     |
| Fas-Rev       | CAAAATGGGCCTCCTTGATA   |
| Polh-For      | GCTACTCGGGAGCAGGTACA   |



Sequential immunization induces strong and broad immunity against all four dengue virus serotypes

|            |                        |
|------------|------------------------|
| Polh-Rev   | GCTCATCTTGTGAGCGTCAT   |
| Cd40-For   | GTGACTTGTGGCTTCAGCAG   |
| Cd40-Rev   | CTGTGCAGTGGCTTGTCACT   |
| Cd69-For   | GAAGATGCTGCTACTCTTGCTG |
| Cd69-Rev   | TGGTGCTATGGCACAGTCAT   |
| Cd79a-For  | ACGATGCCAGGGGGTCTA     |
| Cd79a -Rev | ACTGAAGGCTGAACCACCAT   |
| Cd79b-For  | CACACTGGTGCTGTCTTCCA   |
| Cd79b-Rev  | TGCACCTGAGTGGTTTTGTGT  |
| Cd80-For   | CCCGAGTATAAGAACCGGACT  |
| Cd80-Rev   | TCCATTTTCCAACCAAGAGAA  |
| Cd83-For   | ACCGTGGTTCTGAAGGTGAC   |
| Cd83-Rev   | ATGTGCCCTTGGCTTTGTAA   |
| Cd86-For   | GCTGAGGAAGAAAGAGGAGCA  |
| Cd86-Rev   | CCAGCTCACTCAGGCTTATG   |
| Cxcr4-For  | AATTTTGTTCCTGGTGCAG    |
| Cxcr4-Rev  | GGTGGGCAGGAAGATCCTAT   |
| Actb-For   | CTGTATTCCCCTCCACGTG    |
| Actb-Rev   | CCATCACAATGCCTGTGGTA   |

Sequential immunization induces strong and broad immunity against all four dengue virus serotypes

**Supplementary Table 3 The TaqMan probes for qPCR assay**

| Gene Symbol   | Alias  | Reference Sequence ID | External Forward 5'-3'     | External Reverse 5'-3'     | TaqMan Assay ID |
|---------------|--------|-----------------------|----------------------------|----------------------------|-----------------|
| Irf3          | Irf3   | NM_016849.4           | GAGAGCCGAACGA<br>GGTTCA    | AGCAGCTAACCGC<br>AACACTT   | Mm01203177_m1   |
| Irf4          | Irf4   | NM_013674.1           | CAGGAGCTGGAGG<br>GATTATG   | GGCTTCAGCAGAC<br>CTTATGC   | Mm00516431_m1   |
| Irf5          | Irf5   | NM_012057.4           | CAGTACCCAGGGCT<br>TCAGTG   | GCTTTTGTTAAGG<br>GCACAGC   | Mm00496477_m1   |
| Irf8          | Irf8   | NM_008320.3           | GATCGAACAGATCG<br>ACAGCA   | TCTTCAAATCTG<br>GGCTCTTG   | Mm00492567_m1   |
| Ifnar1        | IFNaR1 | NM_010508.2           | CCCAGAGTTCACCC<br>TCAAGA   | TGAGTGGTGGGAA<br>GCACAC    | Mm00439544_m1   |
| Ifnar2        | IFNaR2 | NM_00111049<br>8.1    | GGAGGGCATGGAG<br>AGCTAC    | TTTTGGAAGTGAC<br>AGGTGGA   | Mm00494916_m1   |
| Ifngr1        | IFNgR1 | NM_010511.2           | GTGCCGTGACCGAC<br>GAATG    | TTGACCGTGCATA<br>GTCAGATTC | Mm00599890_m1   |
| Nfkb1         | NFkB1  | NM_008689.2           | AGGCCATTGAAGTG<br>ATCCAG   | CAGAGATAGCAGT<br>GGGCTGTC  | Mm00476379_m1   |
| Nfkb2         | NFkB2  | NM_00117736<br>9.1    | AGCGTTGCTGGACT<br>ACGG     | GTGGTTGGTGAGG<br>TTGATGA   | Mm00479807_m1   |
| Nfatc1        | NFATc1 | NM_00116410<br>9.1    | GGTGCTGTCTGGCC<br>ATAACT   | GAAACGCTGGTAC<br>TGGCTTC   | Mm00479445_m1   |
| Mki67         | Ki67   | NM_00108111<br>7.2    | CGTGTATCCTTTGG<br>TGGACA   | CACTGGAAGTCCT<br>GCCTGAT   | Mm01278617_m1   |
| Bcl6          | Bcl6   | NM_009744.3           | AGTTTACCCGGCAC<br>GCTAGT   | TATTGCCTTCCCTC<br>AGGTTG   | Mm00477633_m1   |
| Myc           | cMyc   | NM_010849.4           | TCCTGTACCTCGTC<br>CGATTC   | GCACCTCTTGAGG<br>ACCAGTG   | Mm00487804_m1   |
| Tbx21         | Tbet   | NM_019507.2           | CGCGAGGACTACGC<br>ATTG     | CTTCCACACTGC<br>ACCCACT    | Mm00450960_m1   |
| Slamf1        | SLAM   | NM_013730.4           | GTCTGCGATTGCTG<br>GCTAA    | GAGGATGCGGACA<br>CTTTTGT   | Mm00443316_m1   |
| Tnfrsf1<br>3c | BAFFR  | NM_028075.2           | GGACTGATACTGGC<br>GCTGAC   | CGCTGTCTGCATCT<br>TCTTTG   | Mm00840578_g1   |
| Prdm1         | Blimp1 | NM_007548.3           | ACAGAGGCCGAGTT<br>TGAAGA   | GGCATTCTTGGGA<br>ACTGTGT   | Mm00476128_m1   |
| Fas           | Fas    | NM_007987.2           | CGCTGTTTTCCCTT<br>GCTG     | CAAAATGGGCCTC<br>CTTGATA   | Mm00433237_m1   |
| Polh          | Poln   | NM_030715.3           | GCTACTCGGGAGCA<br>GGTACA   | GCTCATCTTGTGA<br>GCGTCAT   | Mm00453168_m1   |
| Cd40          | CD40   | NM_170702.2           | GTGACTTGTGGCTT<br>CAGCAG   | CTGTGCAGTGGCT<br>TGTCAGT   | Mm00441891_m1   |
| Cd69          | CD69   | NM_00103312<br>2.3    | GAAGATGCTGCTAC<br>TCTTGCTG | TGGTGCTATGGCA<br>CAGTCAT   | Mm01183380_m1   |
| Cd79a         | Iga    | NM_007655.3           | ACGATGCCAGGGG<br>GTCTA     | ACTGAAGGCTGAA<br>CCACCAT   | Mm00432423_m1   |
| Cd79b         | Igb    | NM_008339.2           | CACACTGGTGCTGT<br>CTTCCA   | TGCACCTGAGTGG<br>TTTGTGT   | Mm00434143_m1   |
| Cd80          | CD80   | NM_009855.2           | CCCAGATATAAGAA<br>CCGGACT  | TCCATTTTCCAACC<br>AAGAGAA  | Mm00711660_m1   |
| Cd83          | CD83   | NM_009856.2           | ACCGTGGTTCTGAA<br>GGTGAC   | ATGTGCCCTTGGC<br>TTTGTA    | Mm00486868_m1   |

Sequential immunization induces strong and broad immunity against all four dengue virus serotypes

|       |        |             |                           |                          |               |
|-------|--------|-------------|---------------------------|--------------------------|---------------|
| Cd86  | CD86   | NM_019388.3 | GCTGAGGAAGAAA<br>GAGGAGCA | CCAGCTCACTCAG<br>GCTTATG | Mm01344638_m1 |
| Cxcr4 | CXCR4  | NM_009911.3 | AATTTTGTTCCTG<br>GTGCAG   | GGTGGGCAGGAAG<br>ATCCTAT | Mm01292123_m1 |
| Actb  | Bactin | NM_007393.3 | CTGTATTCCCCTCC<br>ACGTG   | CCATCACAATGCC<br>TGTGGTA | Mm02619580_g1 |

Sequential immunization induces strong and broad immunity against all four dengue virus serotypes

**Supplementary Table 4 The murine immunoglobulin genes RNA-seq PCR primers**

| Primer                        | Annotations                                                       | Sequences                                          |
|-------------------------------|-------------------------------------------------------------------|----------------------------------------------------|
| First-strand cDNA synthesis   |                                                                   |                                                    |
| SmartNN<br>Na                 | 5-template-switch adaptor. U = dU                                 | AAGCAGUGGTAUCAACGCAGAGUNNNNUNNNN<br>UNNNNUCTT(rG)4 |
| IGH cDNA synthesis primer mix |                                                                   |                                                    |
| mIGG12_<br>r1                 | cDNA synthesis, mouse IgG1/IgG2<br>heavy-chain mRNA               | KKACAGTCACTGAGCTGCT                                |
| mIGG3_r<br>1                  | cDNA synthesis, mouse IgG3 heavy-<br>chain mRNA                   | GTACAGTACCAAGCTGCT                                 |
| mIGA_r1                       | cDNA synthesis, mouse IgA heavy-<br>chain mRNA                    | CCAGGTCACATTCATCGTG                                |
| mIGM_r1                       | cDNA synthesis, mouse IgM heavy-<br>chain mRNA                    | CTGGATGACTTCAGTGTTGT                               |
| mIGD_r1                       | cDNA synthesis, mouse IgD heavy-<br>chain mRNA                    | GCCATTTCTCATTTTCAGAGG                              |
| mIGE_r1                       | cDNA synthesis, mouse IgE heavy-<br>chain mRNA                    | G TTCACAGTGCTCATGTTC                               |
| First PCR amplification       |                                                                   |                                                    |
| M1SS                          | Step-out primer 1, anneals on the switch<br>adaptor               | AAGCAGTGGTATCAACGCA                                |
| IGH reverse primer mix        |                                                                   |                                                    |
| MIGG12_<br>r2                 | Nested primer with Z adaptor, mouse<br>IgG1/IgG2 heavy-chain cDNA | ATTGGGCAGCCCTGATTAGTGGATAGACMGATG                  |
| mIGG3_r<br>2                  | Nested primer with Z adaptor, mouse<br>IgG3 heavy-chain cDNA      | ATTGGGCAGCCCTGATTAAGGGATAGACAGATG                  |
| mIGA_r2                       | Nested primer with Z adaptor, mouse<br>IgA heavy-chain cDNA       | ATTGGGCAGCCCTGATTTTCAGTGGGTAGATGGT<br>G            |
| mIGM_r2                       | Nested primer with Z adaptor, mouse<br>IgM heavy-chain cDNA       | ATTGGGCAGCCCTGATTGGGGGAAGACATTTGG                  |
| mIGD_r2                       | Nested primer with Z adaptor, mouse<br>IgD heavy-chain cDNA       | ATTGGGCAGCCCTGATTCTCTGAGAGGAGGAAC                  |
| mIGE_r2                       | Nested primer with Z adaptor, mouse<br>IgE heavy-chain cDNA       | ATTGGGCAGCCCTGATTAAGGGGTAGAGCTGAG                  |
| Second PCR amplification      |                                                                   |                                                    |
| IGH                           |                                                                   |                                                    |
| VH1                           | VH1 External 1                                                    | agRtYcagctgcaRcagtct                               |
| VH1_2                         | VH1 External 2                                                    | aggtccaactgcagcagcc                                |
| VH2                           | VH2 External                                                      | tctgcctggtgacWttcca                                |
| VH3                           | VH3 External                                                      | gtgcagcttcaggagtcag                                |
| VH4                           | VH4 External                                                      | gaggtgaagcttctcgagtc                               |
| VH5                           | VH5 External                                                      | gaagtgaagctggtggagtc                               |
| VH6                           | VH6 External                                                      | atgKactgggactgaRctgt                               |
| VH7                           | VH7 External                                                      | cagtgtaggtgaagctggt                                |
| VH8                           | VH8 External                                                      | ccaggttactctgaaagagtc                              |
| VH9                           | VH9 External                                                      | tgtggaccttgctattcctga                              |

Sequential immunization induces strong and broad immunity against all four dengue virus serotypes

|               |                    |                       |
|---------------|--------------------|-----------------------|
| VH10          | VH10 External      | tgttggggctgaagtgggtt  |
| VH11          | VH11 External      | atggagtgggaactgagctta |
| VH12          | VH12 External      | agcttcaggagtcaggacc   |
| VH13          | VH13 External      | caggtgcagctgtagagac   |
| VH14          | VH14 External      | atgcagctgggtcatcttctt |
| VH15          | VH15 External      | gactggatttggatcacKctc |
| VH16          | VH16 External      | tggagtttggacttagtggg  |
| C $\mu$       | C mu External      | catggccaccagattcttacc |
| C $\gamma$    | C gamma External 1 | agggaaataRcccttgaccag |
| C $\gamma$ _2 | C gamma External 2 | agggaagtagcctttgacaag |
| C $\delta$    | C delta External   | tctgagaggaggaacatgac  |
